# Supplementary material
Source: MDPI journal article supplement (https://www.mdpi.com/2073-4433/8/11/218)
Supplement: s1 [file s1]

### DERIVATION OF EQUATION 3

From equation 1 in the text it holds:

$$b_{\text{abs}}(\lambda) = \underbrace{\left[ (BC_{\text{FF}} + BC_{\text{WB}}) \cdot \sigma_0^{\text{BC}} \right]}_{\text{A}} \lambda^{-\alpha_{\text{BC}}} + \underbrace{\left[ BrC \cdot \sigma_0^{\text{BrC}} \right]}_{\text{B}} \lambda^{-\alpha_{\text{BrC}}} =$$

$$\left[ (BC_{\text{FF}} + BC_{\text{WB}}) \cdot MAC_{\lambda_{\text{ref}1}}^{\text{BC}} \right] \left( \frac{\lambda}{\lambda_{\text{ref}1}} \right)^{-\alpha_{\text{BC}}} + \left[ BrC \cdot MAC_{\lambda_{\text{ref}2}}^{\text{BrC}} \right] \left( \frac{\lambda}{\lambda_{\text{ref}2}} \right)^{-\alpha_{\text{BrC}}}$$

where  $\sigma_0^{\text{BC}} = \frac{MAC_{\lambda_{\text{ref}1}}^{\text{BC}}}{\lambda_{\text{ref}1}^{-\alpha_{\text{BC}}}}$  and  $\sigma_0^{\text{BrC}} = \frac{MAC_{\lambda_{\text{ref}2}}^{\text{BrC}}}{\lambda_{\text{ref}2}^{-\alpha_{\text{BrC}}}}$  only depend on BC and BrC properties.  $MAC_{\lambda_{\text{ref}1}}^{\text{BC}}$  and

$MAC_{\lambda_{\text{ref}2}}^{\text{BrC}}$  are mass specific absorption coefficients (in  $\text{m}^2\text{g}^{-1}$ ) at chosen reference wavelengths ( $\lambda_{\text{ref}1}$  and  $\lambda_{\text{ref}2}$ ) for BC and BrC, called respectively.

From equation 2, it holds

$$b_{\text{abs}}(\lambda) = \underbrace{\left[ BC_{\text{FF}} \cdot \sigma_0^{\text{BC}} \right]}_{\text{A}'} (\lambda)^{-\alpha_{\text{FF}}} + \underbrace{\left[ BC_{\text{WB}} \cdot \sigma_0^{\text{BC}} + BrC \cdot \sigma_0^{\text{BrC}} \right]}_{\text{B}'} (\lambda)^{-\alpha_{\text{WB}}}.$$

By comparison of the terms, eq. 3 is derived.
